# Supplementary material for: Cross-cultural adaptation and validation of the Arabic version of the functional index for hand osteoarthritis
Source: Springer Nature journal article supplement (doi:10.1186/s12891-020-03418-8), 2020-06-19
Supplement: MOESM1 [file 18101696]

**The original English version of FIHOA**

|                                                                                                  | Possible without difficulty | Possible with slight difficulty | Possible with important difficulty | Impossible |
|--------------------------------------------------------------------------------------------------|-----------------------------|---------------------------------|------------------------------------|------------|
| 1-Are you able to turn a key in a lock?                                                          |                             |                                 |                                    |            |
| 2-Are you able to cut meat with a knife?                                                         |                             |                                 |                                    |            |
| 3-Are you able to cut cloth or paper with a pair of scissors?                                    |                             |                                 |                                    |            |
| 4-Are you able to lift a full bottle with the hand?                                              |                             |                                 |                                    |            |
| 5-Are you able to clench your fist?                                                              |                             |                                 |                                    |            |
| 6-Are you able to tie a knot?                                                                    |                             |                                 |                                    |            |
| 7- <i>For women</i> - Are you able to sew?<br><i>For men</i> - Are you able to use a screwdriver |                             |                                 |                                    |            |
| 8-Are you able to fasten buttons                                                                 |                             |                                 |                                    |            |
| 9-Are you able to write for a long period of time (10 mn)?                                       |                             |                                 |                                    |            |
| 10-Would you accept a handshake without reluctance?                                              |                             |                                 |                                    |            |

The Functional Index for Hand Osteoarthritis (FIHOA), which was validated and published by Dreiser, Maheu and colleagues for the first time in its English original version in 1995 [3]. The FIHOA has been translated into 21 languages, which are accessible on the FIHOA website [5] as well as the original English version.
